# Supplementary material
Source: Research Square preprint supplement (doi:10.21203/rs.3.rs-8765697/v2)
Supplement: Supplementary file 1 [file 60ead894edddb39c716c1f86.docx]

**Table no. 1 Socio demographic Details**

| **Characteristic** | **Number** | **Percentage %** |
| --- | --- | --- |
| **Gender** |  |  |
| Female | 114 | 64.8% |
| Male | 62 | 35.2% |
| **Year of Residency** |  |  |
| First year | 70 | 39.8% |
| Second year | 43 | 24.4% |
| Third year | 63 | 35.8% |
| **Specialty** |  |  |
| Medical | 84 | 47.7% |
| Surgical | 61 | 34.7% |
| Non-clinical / Paraclinical | 31 | 17.6% |
| **Marital Status** |  |  |
| Single | 102 | 58.0% |
| Married | 74 | 42.0% |
| **Job Status (Job to resume after residency)** |  |  |
| Yes | 28 | 15.9% |
| No | 148 | 84.1% |
| **Health Issues** |  |  |
| Yes | 31 | 17.6% |
| No | 145 | 82.4% |

**Table No. 2 Clinical details**

| **Variable** | **% (Percentage), Frequency** |
| --- | --- |
| Perceived Stress (PSS-10 ) | High Stress - 22.2% (N= 39)  Moderate Stress - 67.6% (N = 119),  Low Stress - 10.2% (N = 18). |
| Burnout (aCBI ) | 56.3% (N = 99)  Internal Burnout - 44.9% (N = 79)  External Burnout -30.7% (N = 54). |
| Depressive symptoms (PSQ-4D ) | Present-50.0% (N=88)  Absent -50.0% (N=88) |
| Resilient Coping (BRCS ) | High Resilience- 11.9% (N = 21)  Moderate Resilience - 36.4% (N = 64)  Low Resilience - 51.7% (N = 91) |
